# Supplementary material
Source: publisher figshare collection journal article supplement (https://acs.figshare.com/ndownloader/files/4601023)
Supplement: Supplementary file 1 [file 4601023]

## Supporting Information

### **Mixed-Solvothermal Syntheses and Structures of Six New Zinc Phosphonocarboxylates with Zeolite-type and Pillar-layered Frameworks**

Zhenxia Chen, Yaming Zhou, Linhong Weng and Dongyuan Zhao\*

*Shanghai Key Laboratory of Molecular Catalysis and Innovative Materials,  
Department of Chemistry, and Advanced Materials Laboratory, Fudan University,  
Shanghai, 200433, P. R. China*

\*Corresponding author. Tel.: +86 21 55664194; fax: +86 21 65641740. E-mail  
address: [dyzhao@fudan.edu.cn](mailto:dyzhao@fudan.edu.cn)

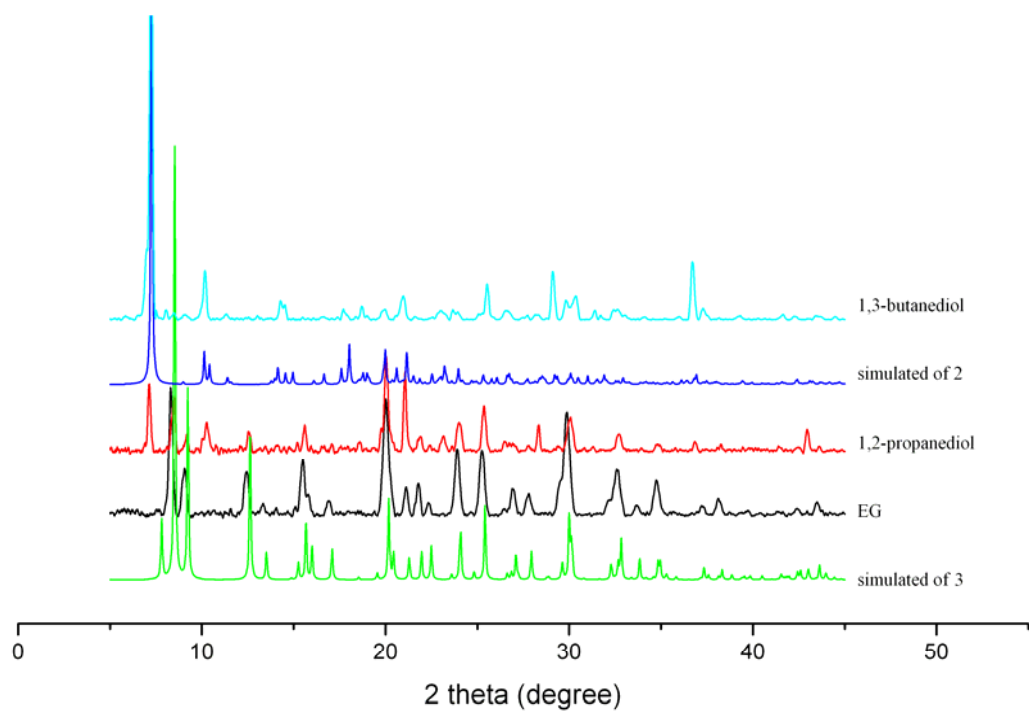

Figure S1. XRD patterns of the samples synthesized under different solvents, the simulated patterns from the single-crystal structures of compounds **2** and **3** are given for comparison.

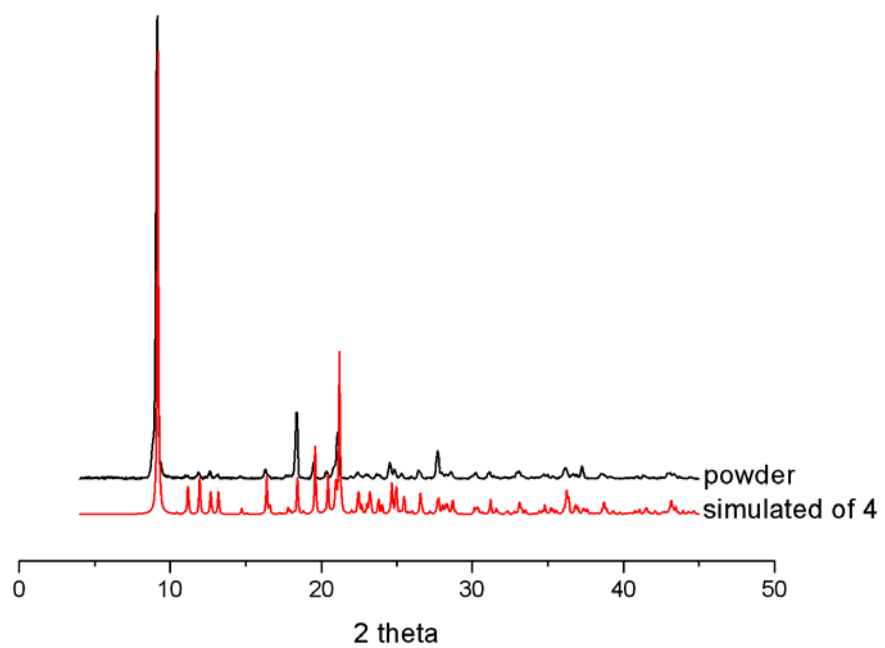

Figure S2. XRD patterns of the powder sample for compound **4** and a simulated pattern from the single-crystal structure.

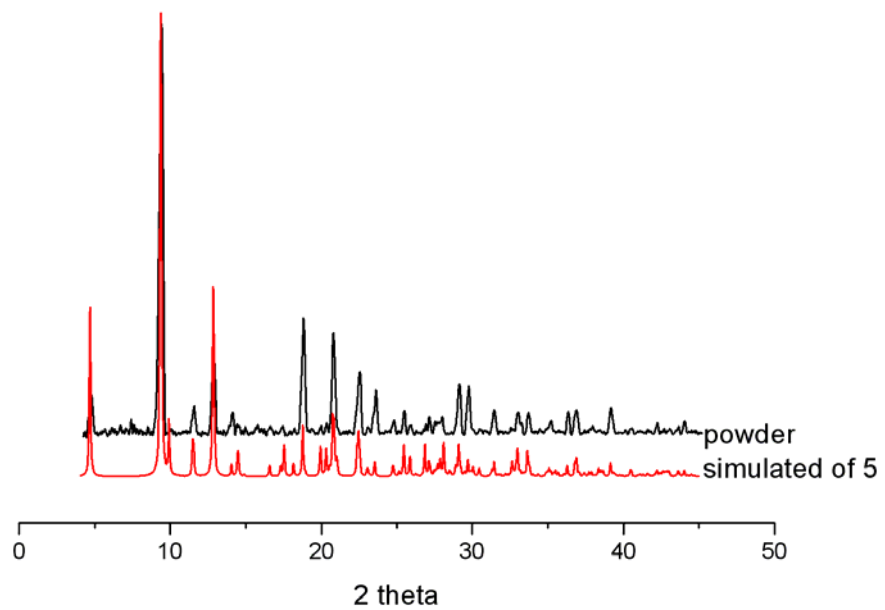

Figure S3. The XRD patterns of the powder sample for compound **5** and a simulated pattern from the single-crystal structure.

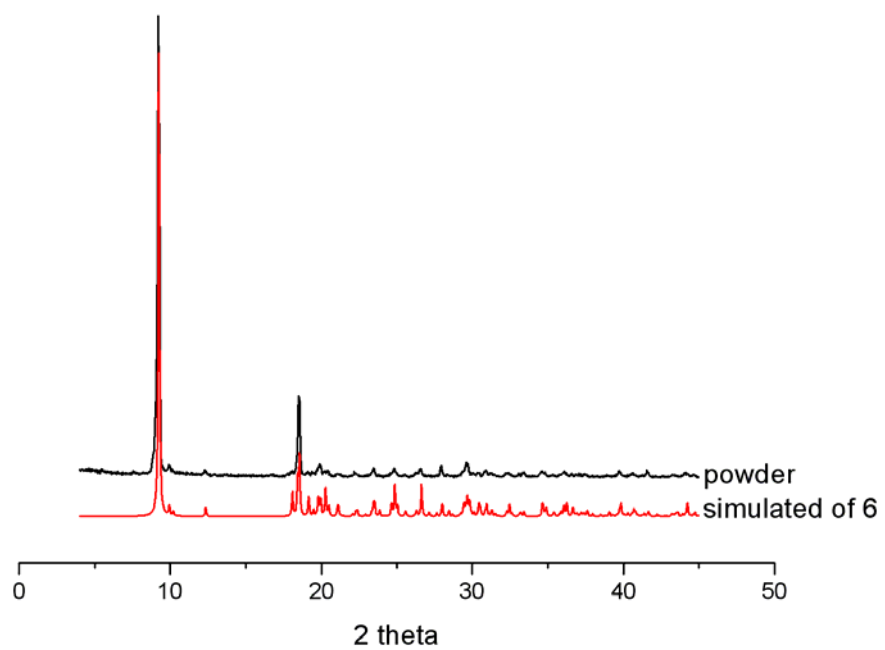

Figure S4. The XRD patterns of the powder sample for compound **6** and a simulated pattern from the single-crystal structure.

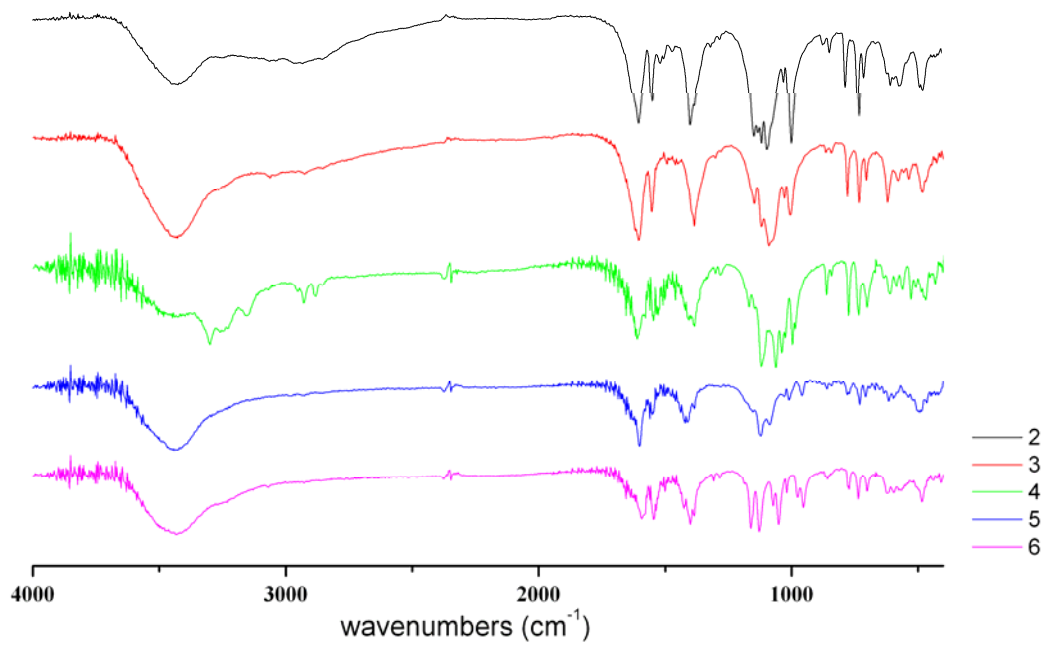

Figure S5. IR spectra of compounds **2** ~ **6**.

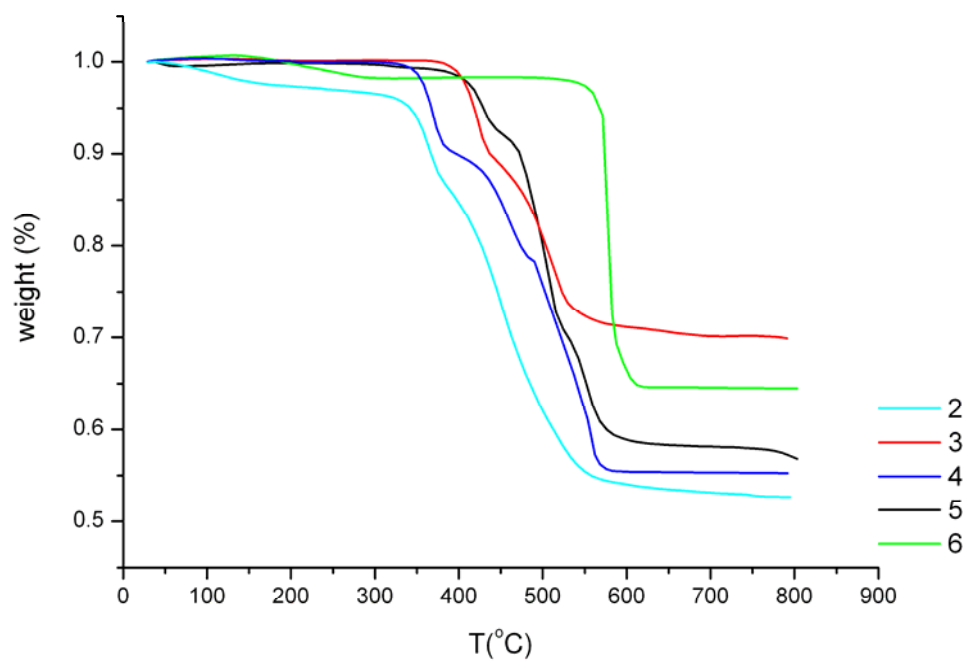

Figure S5. TG curves of compounds **2** ~ **6**.
